# Supplementary material for: Enhanced Cellular Cryopreservation by Biopolymer-Associated Suppression of RhoA/ROCK Signaling Pathway
Source: MDPI journal article supplement (doi:10.3390/ma14206056), 2021-10-14
Supplement: s1 [file s1]

## **SUPPORTING INFORMATION**

# **Enhanced cellular cryopreservation by biopolymer-associated suppression of RhoA/ROCK signaling pathway**

**Tae Wook Lee<sup>1\*</sup>, Gyeong Won Lee<sup>1\*</sup>, Seon Yeong An<sup>1</sup>, Keum-Yong Seong<sup>1</sup>, Jong Soo Lee<sup>2#</sup> and Seung Yun Yang<sup>1#</sup>**

1. Affiliation 1 ; Department of Biomaterials Science (BK21 Four Program), Life and Industry Conver-gence Institute, Pusan National University, Miryang 50463, Republic of Korea

2. Affiliation 2 ; Department of Ophthalmology, Pusan National University College of Medicine & Medical Research Institute of Pusan National University Hospital, Busan 49241, Republic of Korea

\* These authors contributed equally to this work

# Correspondence: S. Y. Yang (E-mail: syang@pusan.ac.kr), J. S. Lee (E-mail: jongsool@pusan.ac.kr)

**KEYWORDS:** Cryopreservation; Hyaluronic acid; Dimethyl sulfoxide (DMSO), RhoA/ROCK signaling pathway; Polymeric cryoprotectant

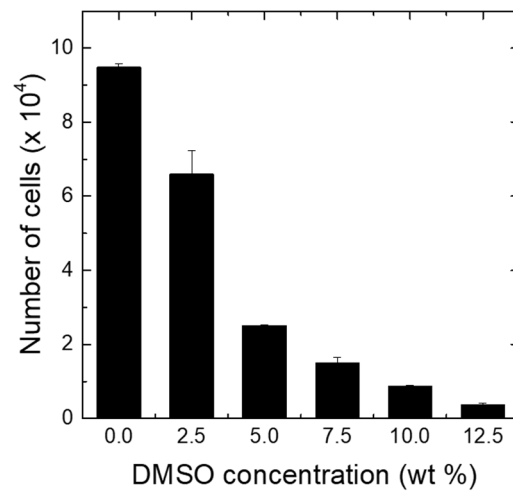

**Figure S1.** Cell viability tests using NIH-3T3 fibroblasts cultured in media containing different DMSO concentrations for 3 h.

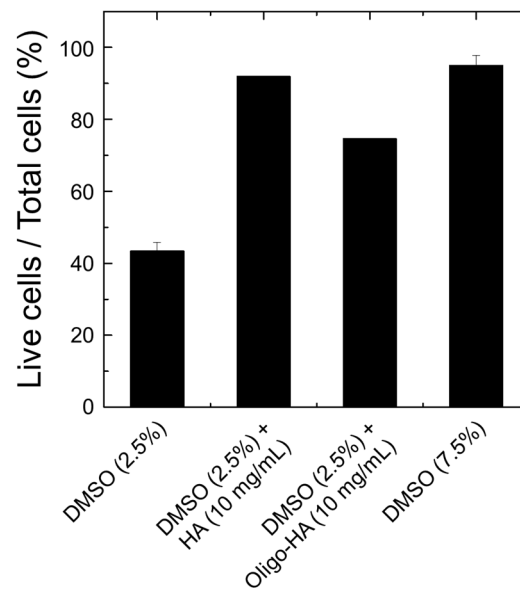

**Figure S2.** Bar graph showing the percentage of live cells per total cells after cryopreservation with different cryopreservation media.

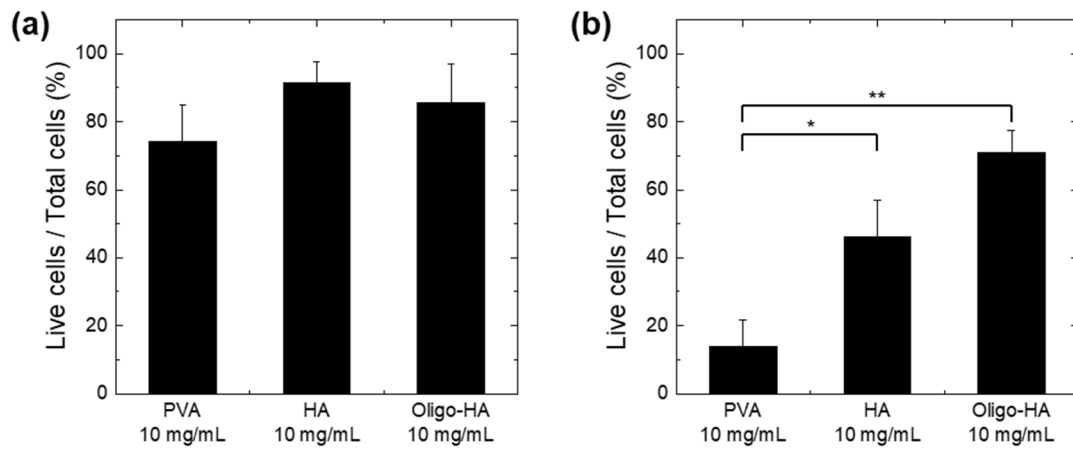

**Figure S3.** Bar graphs showing the ratio of viable cells per total cells in (a) human adipose-derived mesenchymal stem cells and (b) rabbit corneal stromal cells measured by the trypan blue exclusion assay. PVA, HA and Oligo-HA with 10 mg/mL concentrations were supplemented to 2.5 w% DMSO cryopreservation media. The data represent the mean  $\pm$  S.D. \*  $p < 0.05$  and \*\*  $p < 0.01$ .
